# Supplementary material for: Reversal of alopecia areata, osteoporosis follow treatment with activation of Tgr5 in mice
Source: PubMed Central journal article supplement (PMC8292761; doi:10.1042/bsr20210609), 2021-07-20
Supplement: BSR-2021-0609_supp.pdf [file BSR-2021-0609_supp.pdf]

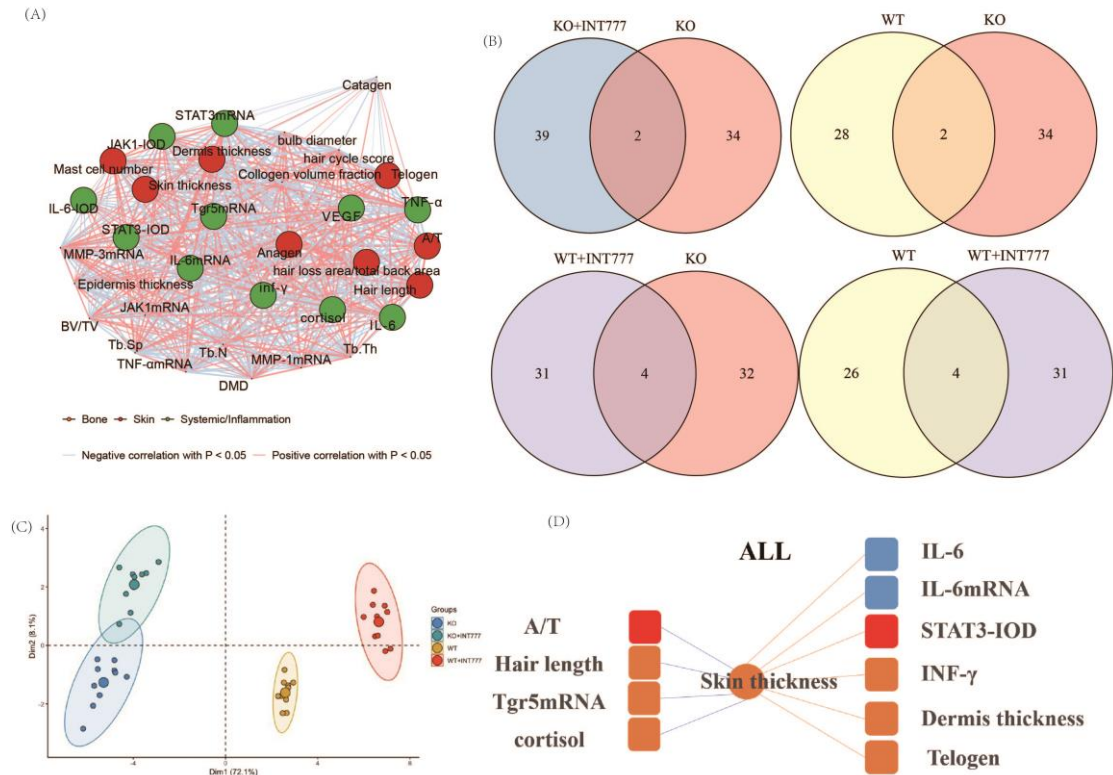

**Supplement Figure 1** Correlation of Tgr5 and AA, Osteoporosis in Tgr5<sup>-</sup> mice. **(A)** Lines show correlations based on Spearman’s rank analysis with  $p < 0.05$ , with line thickness proportional to the correlation strength. **(B)** Venn diagrams comparing unique and shared Correlations between WT group, WT+INT777 group, KO group, KO+INT777 group. **(C)** Principal coordinate analysis. **(D)** Primary “first neighbor” network of skin thickness. Data are expressed as the means  $\pm$  standard deviation. One-way ANOVA followed by Tukey’s multiple tests has been used.  $n=10$  per group. WT: wild type, KO: Knock Out. IOD: integrated Optical Density.

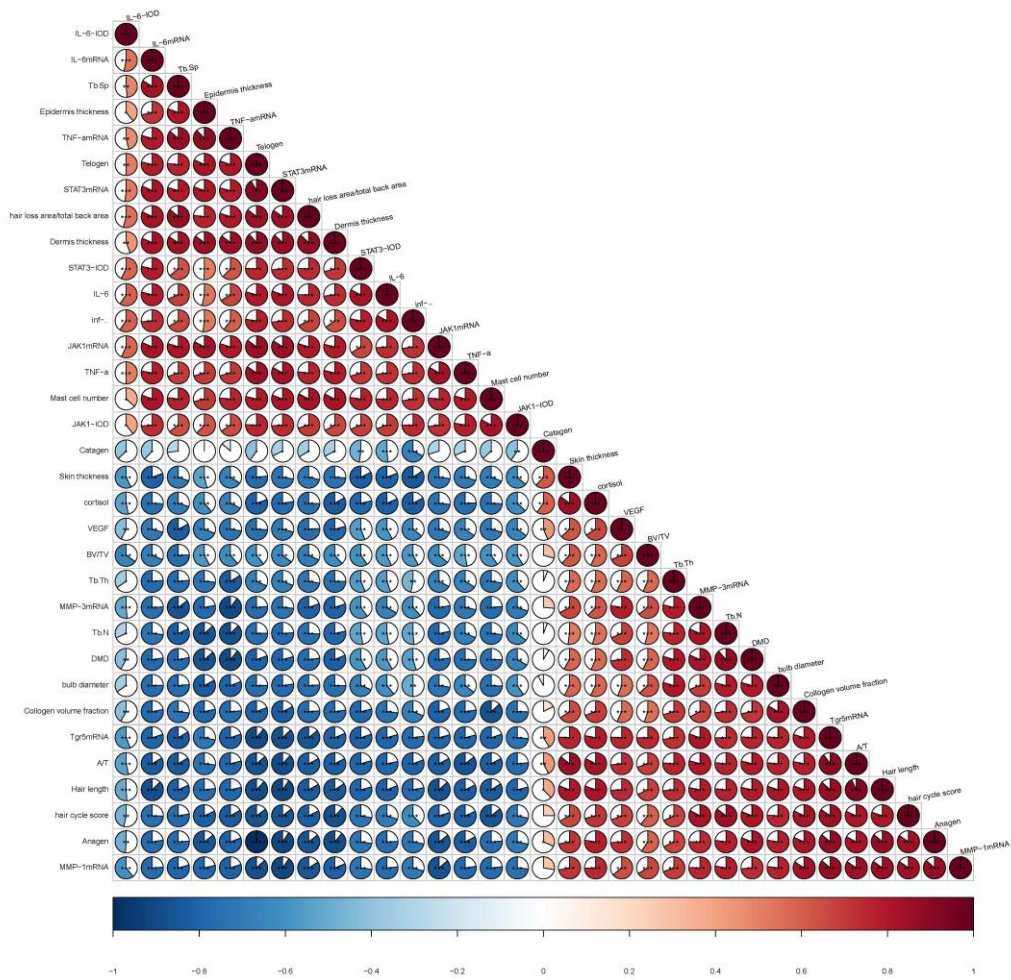

**Supplement Figure 2** The detailed correlation networks of All groups.\*  $P < 0.05$ , \*\* $P < 0.01$ . IL-6, Interleukin-6. IOD, integrated optical density. TNF- $\alpha$ , tumor necrosis factor- $\alpha$ . STAT3, Signal transducer, and activator of transcription 3. VEGF, vascular endothelial growth factor. IFN- $\gamma$ , interferon- $\gamma$ . Tgr5: G-protein-coupled bile acid receptor-5. JAK1, Janus kinase1. MMP-1: matrix metalloproteinase-1. MMP-3: matrix metalloproteinase-3.

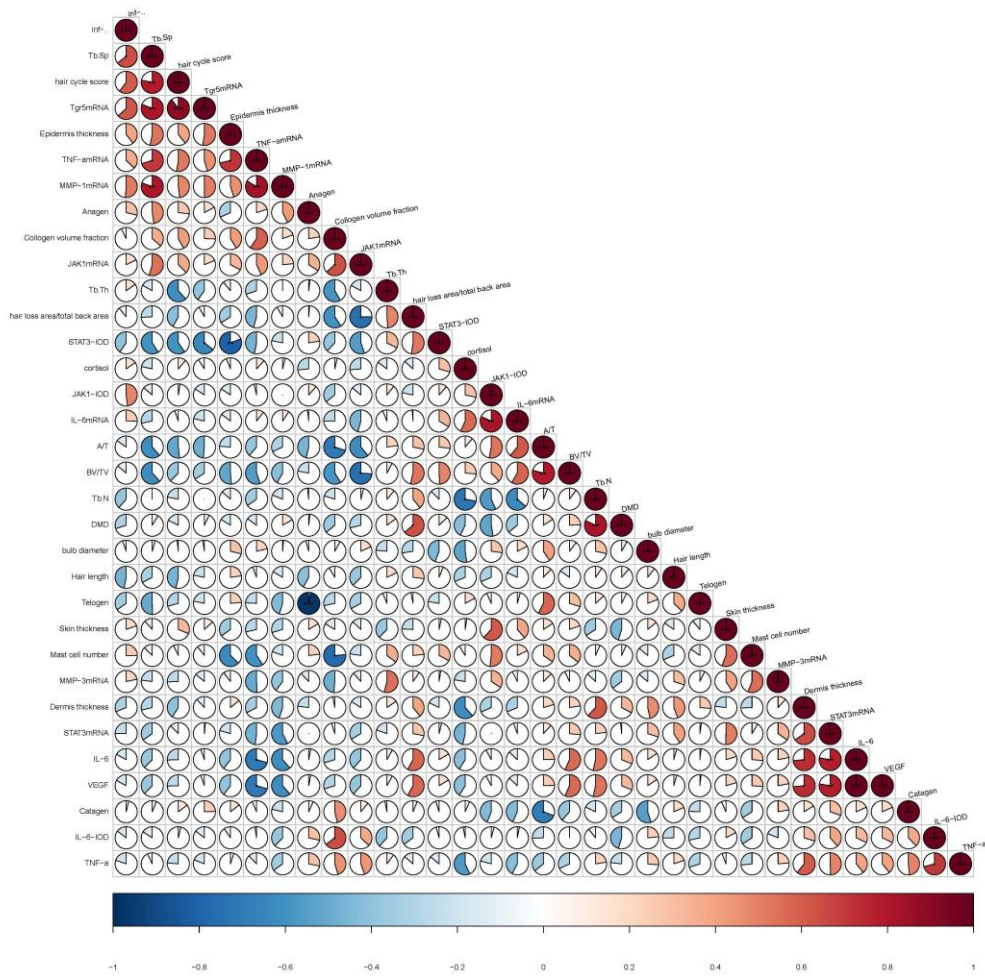

**Supplement Figure 3** The detailed correlation networks of the WT group. n=10 per group. \*  $P < 0.05$ , \*\*  $P < 0.01$ . IL-6, Interleukin-6. IOD, integrated optical density. TNF- $\alpha$ , tumor necrosis factor- $\alpha$ . STAT3, Signal transducer, and activator of transcription 3. VEGF, vascular endothelial growth factor. INF- $\gamma$ , interferon- $\gamma$ . Tgfr5: G-protein-coupled bile acid receptor-5. JAK1, Janus kinase1. MMP-1: matrix metalloproteinase-1. MMP-3: matrix metalloproteinase-3.

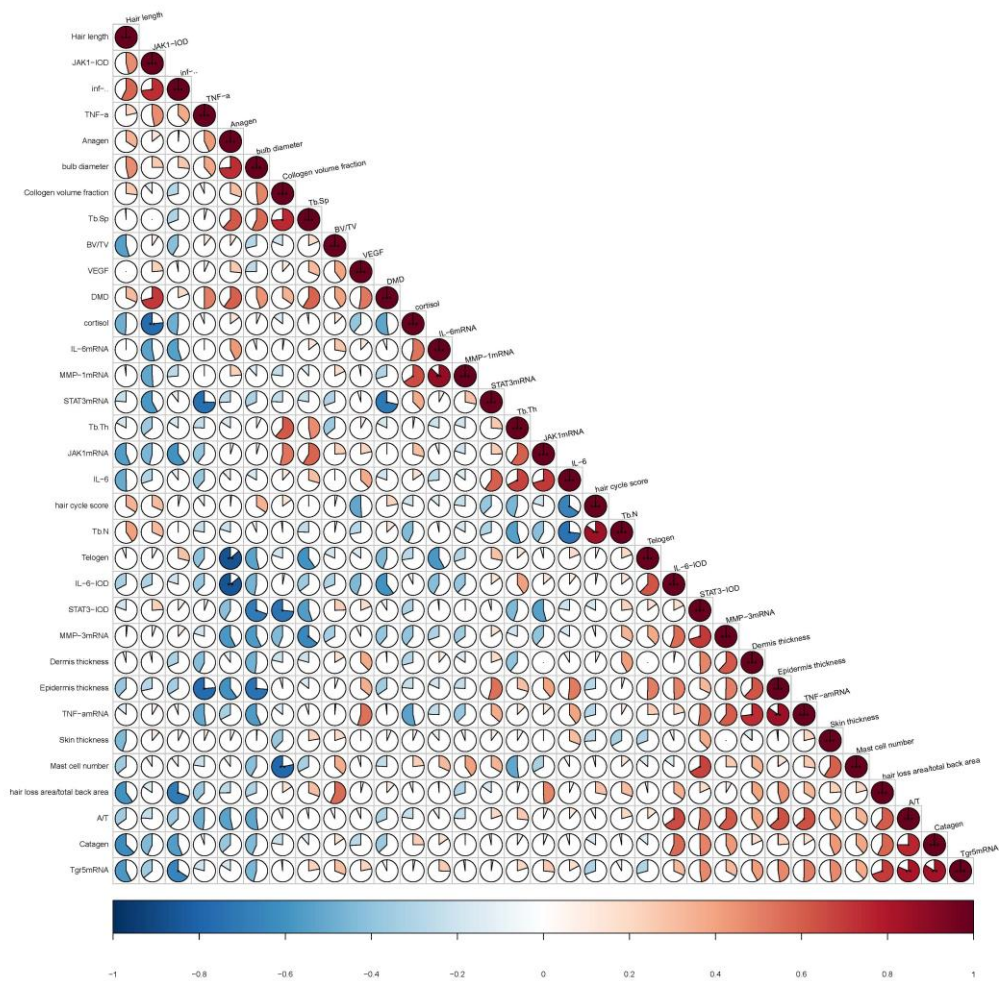

**Supplement Figure 4** The detailed correlation networks of WT+INT777 group. \*  $P < 0.05$ , \*\*  $P < 0.01$ . IL-6, Interleukin-6. IOD integrated optical density. TNF- $\alpha$ , tumor necrosis factor- $\alpha$ . STAT3, Signal transducer, and activator of transcription 3. VEGF, vascular endothelial growth factor. INF- $\gamma$ , interferon- $\gamma$ . Tgr5: G-protein-coupled bile acid receptor-5. JAK1, Janus kinase1. MMP-1: matrix metalloproteinase-1. MMP-3: matrix metalloproteinase-3.

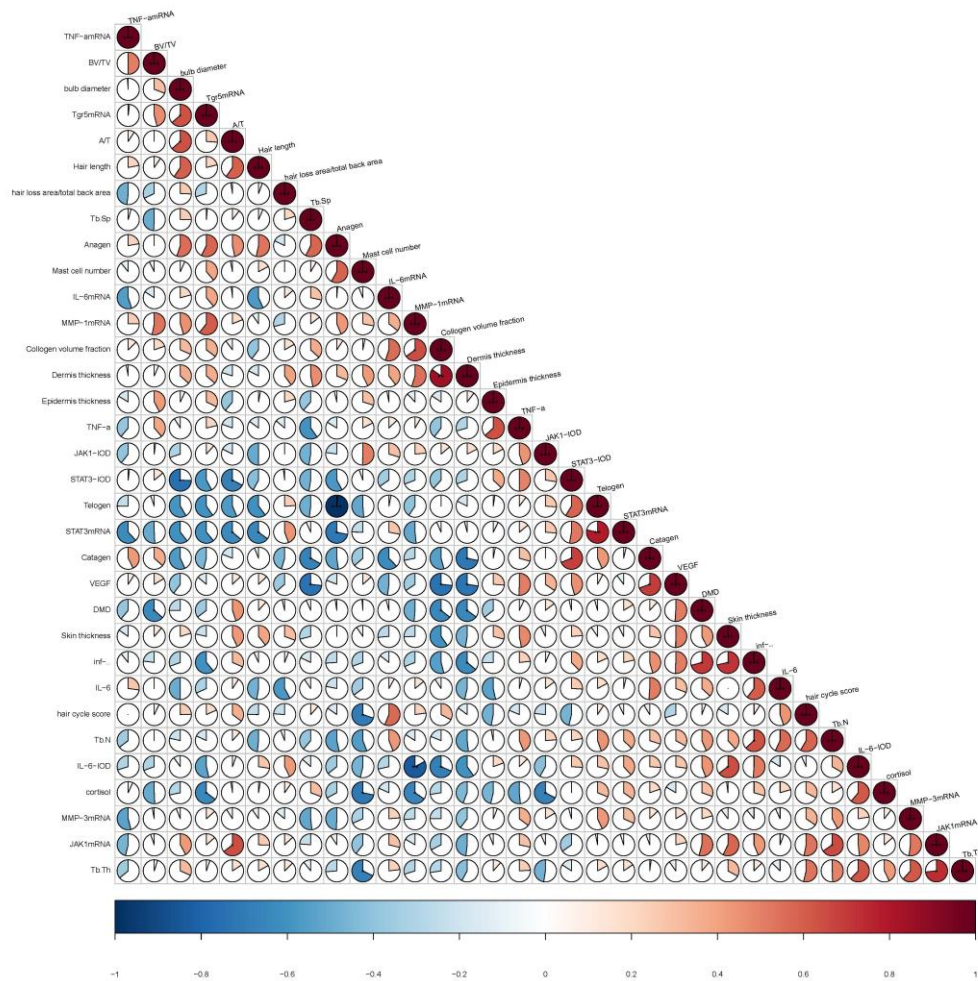

**Supplement Figure 5** The detailed correlation networks of the KO group. \*  $P < 0.05$ , \*\*  $P < 0.01$ . IL-6, Interleukin-6. IOD integrated optical density. TNF- $\alpha$ , tumor necrosis factor- $\alpha$ . STAT3, Signal transducer, and activator of transcription 3. VEGF, vascular endothelial growth factor. INF- $\gamma$ , interferon- $\gamma$ . Tgr5: G-protein-coupled bile acid receptor-5. JAK1, Janus kinase1. MMP-1: matrix metalloproteinase-1. MMP-3: matrix metalloproteinase-3.

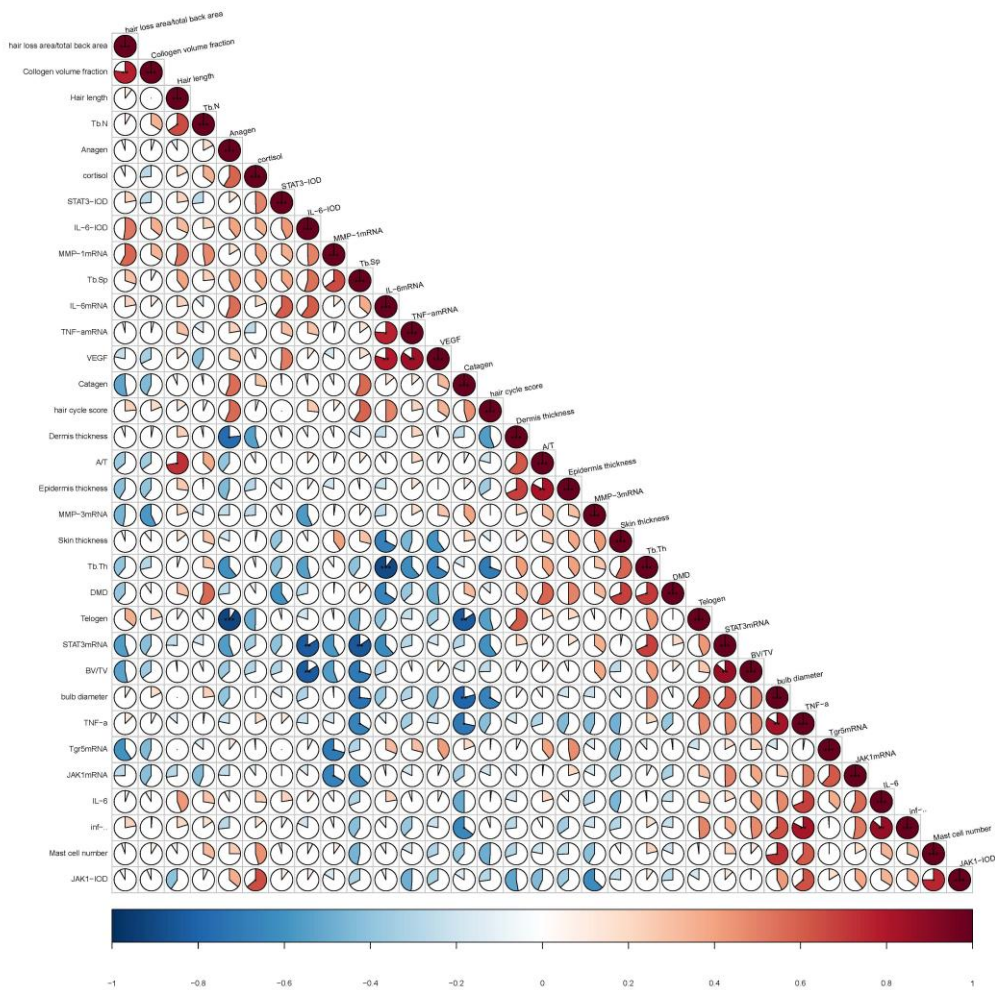

**Supplement Figure 6** The detailed correlation networks of the KO+INT777 group. \*  $P < 0.05$ , \*\*  $P < 0.01$ . IL-6, Interleukin-6. IOD integrated optical density. TNF- $\alpha$ , tumor necrosis factor- $\alpha$ . STAT3, Signal transducer, and activator of transcription 3. VEGF, vascular endothelial growth factor. INF- $\gamma$ , interferon- $\gamma$ . Tgr5: G-protein-coupled bile acid receptor-5. JAK1, Janus kinase1. MMP-1: matrix metalloproteinase-1. MMP-3: matrix metalloproteinase-3.

Supplement Table 1: Primer Sequences used for RT-qPCR

|       | Forward primer sequences       | Reverse primer sequences           |
|-------|--------------------------------|------------------------------------|
| GAPDH | 5'-AACTTTGGCATTGTGGAAGG-3'     | 5'ACACATTGGGGGTAGGAACA-3'          |
| JAK1  | 5'- - TGCACCGACTTTGACAACATT-3' | 5'TGAGGTGGTTCATGAGGTCTC-3'         |
| STAT3 | 5'-TGGGCATCAATCCTGTGGTAT -3'   | 5'- - TAGTTCACACCAGGCCCTAAG-3'     |
| MMP-1 | 5'CAGAGATGAAGTCCGGTTTTTC-3'    | 5'-GGGGTATCCGTGTAGCACAT-3'         |
| TNF-a | 5'- AGGCTGCCCCGACTACGT-3'      | 5'- GACTTTCTCCTGGTATGAGATAG CAA-3' |
| IL-6  | 5'-GGCGGATCGGATGTTGTGAT-3'     | 5'-GGACCCCAGACAATCGGTTG-3'         |
| MMP-3 | 5'-GTCCTCCACAGACTTGTCCC-3'     | 5'-AGGACATCAGGGGATGCTGT-3'         |
| TGR5  | 5'-CCCAACUUCUCCUCCUCUTT-3'     | 3'-AGAGGAAGGAGAAGUUGGGTT-5'        |

Supplement Table 2: the Tgr5 mRNA level in the rescue experiment

|            | WT group    | KO group      |
|------------|-------------|---------------|
| Left tibia | 1.156±0.098 | 0.141±0.051** |
| Tail       | 1.026±0.105 | 0.122±0.032*  |
| Skin       | 1.119±0.163 | 0.195±0.072** |

\* Compare with WT group, \*  $P < 0.05$ , \*\*  $P < 0.01$
